# Supplementary material for: ESIPT geometrical isomers with distinct mechanofluorochromism and intra/intermolecular H-bonding controlled tunable fluorescence
Source: Royal Society of Chemistry journal article supplement (doi:10.1039/d2ce01210c), 2022-01-01
Supplement: d2ce01210c1.pdf [file d2ce01210c1.pdf]

# Electronic Supplementary Information (ESI)

## ESIPT geometrical isomers with distinct mechanofluorochromism and intra/intermolecular H-bonding controlled tunable fluorescence

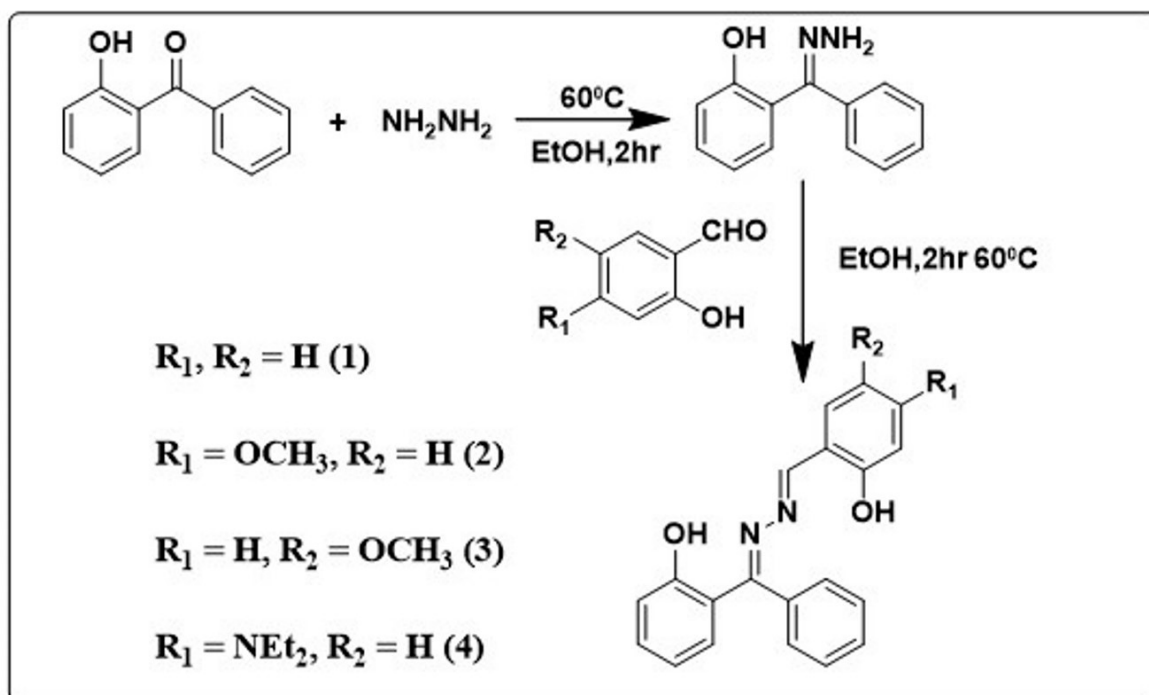

Scheme S1. Synthesis of **1-4**.



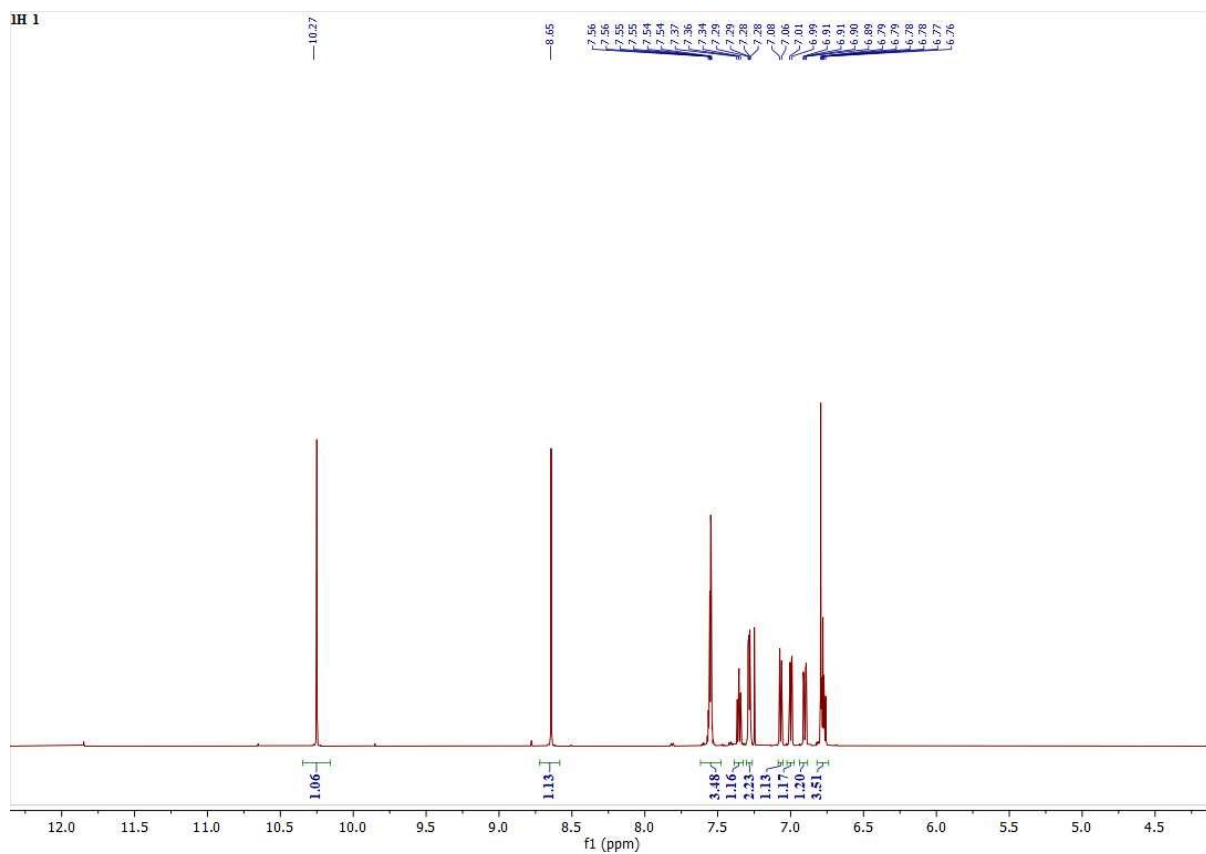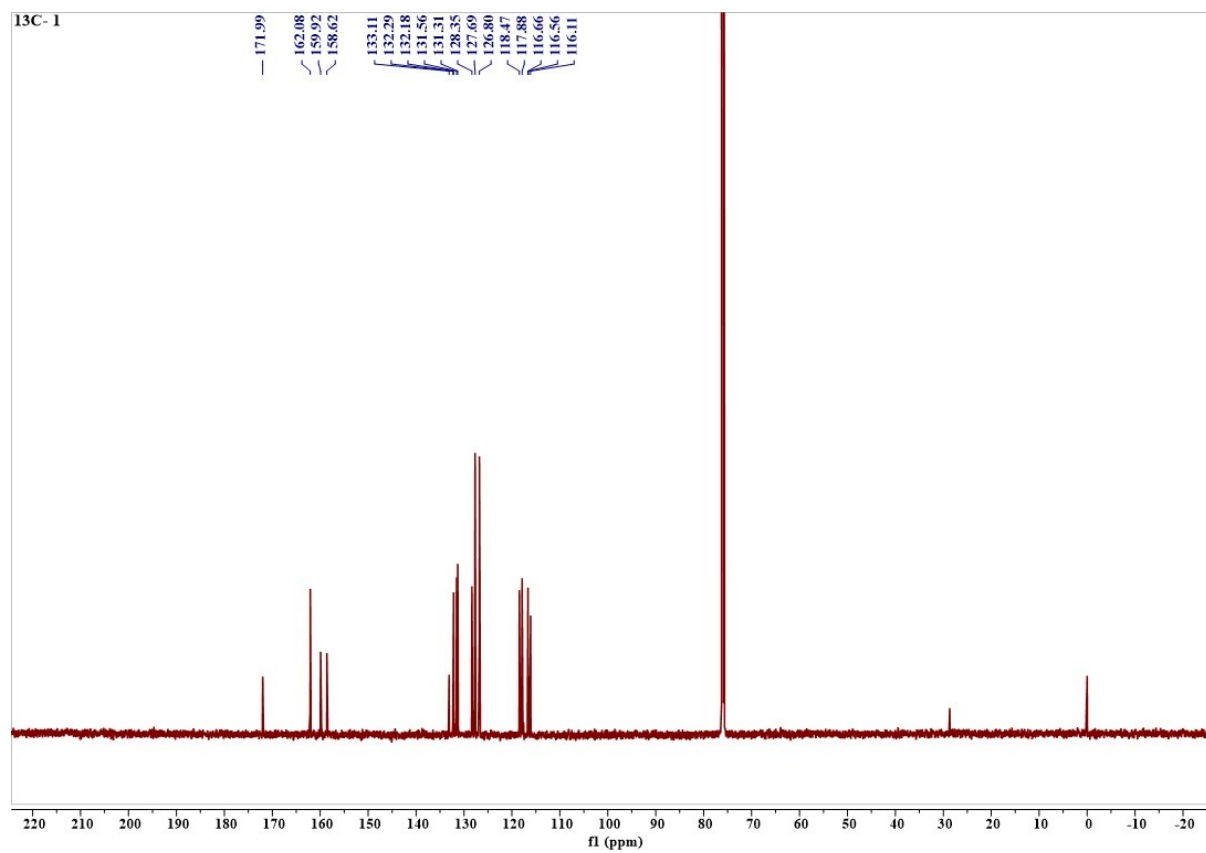

**<sup>1</sup>H & <sup>13</sup>C NMR of 1**

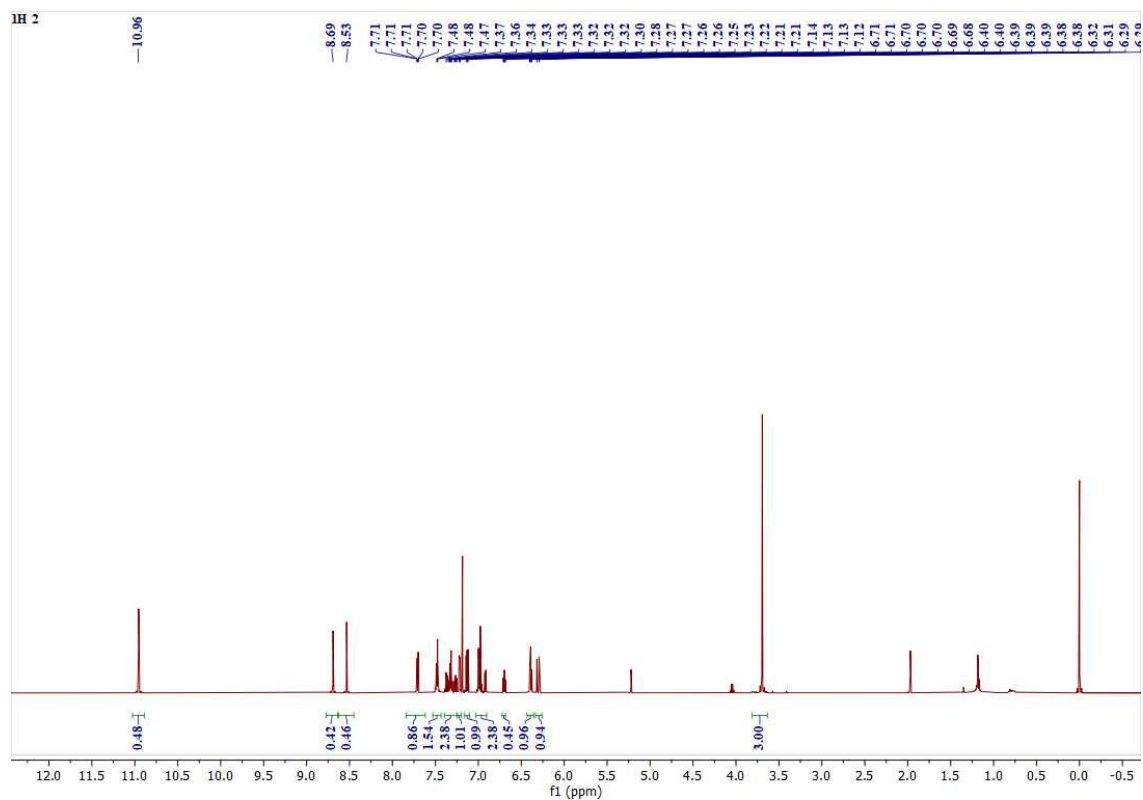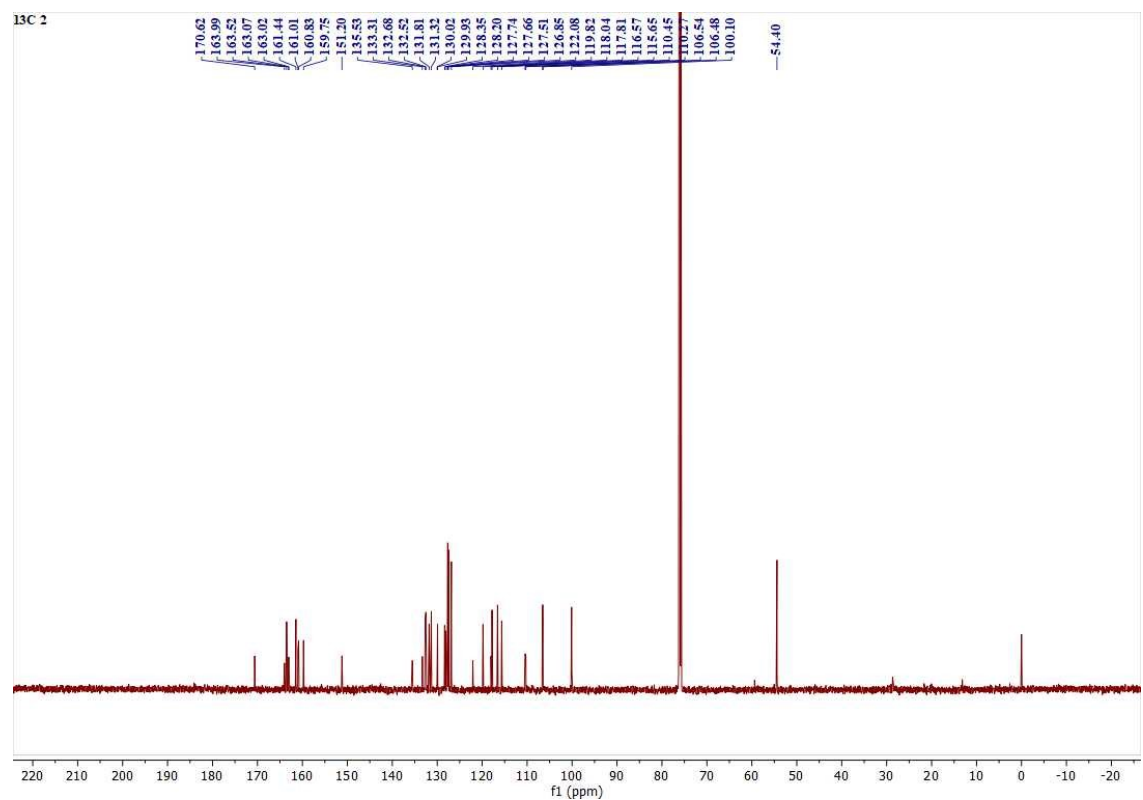

**<sup>1</sup>H & <sup>13</sup>C NMR of 2**

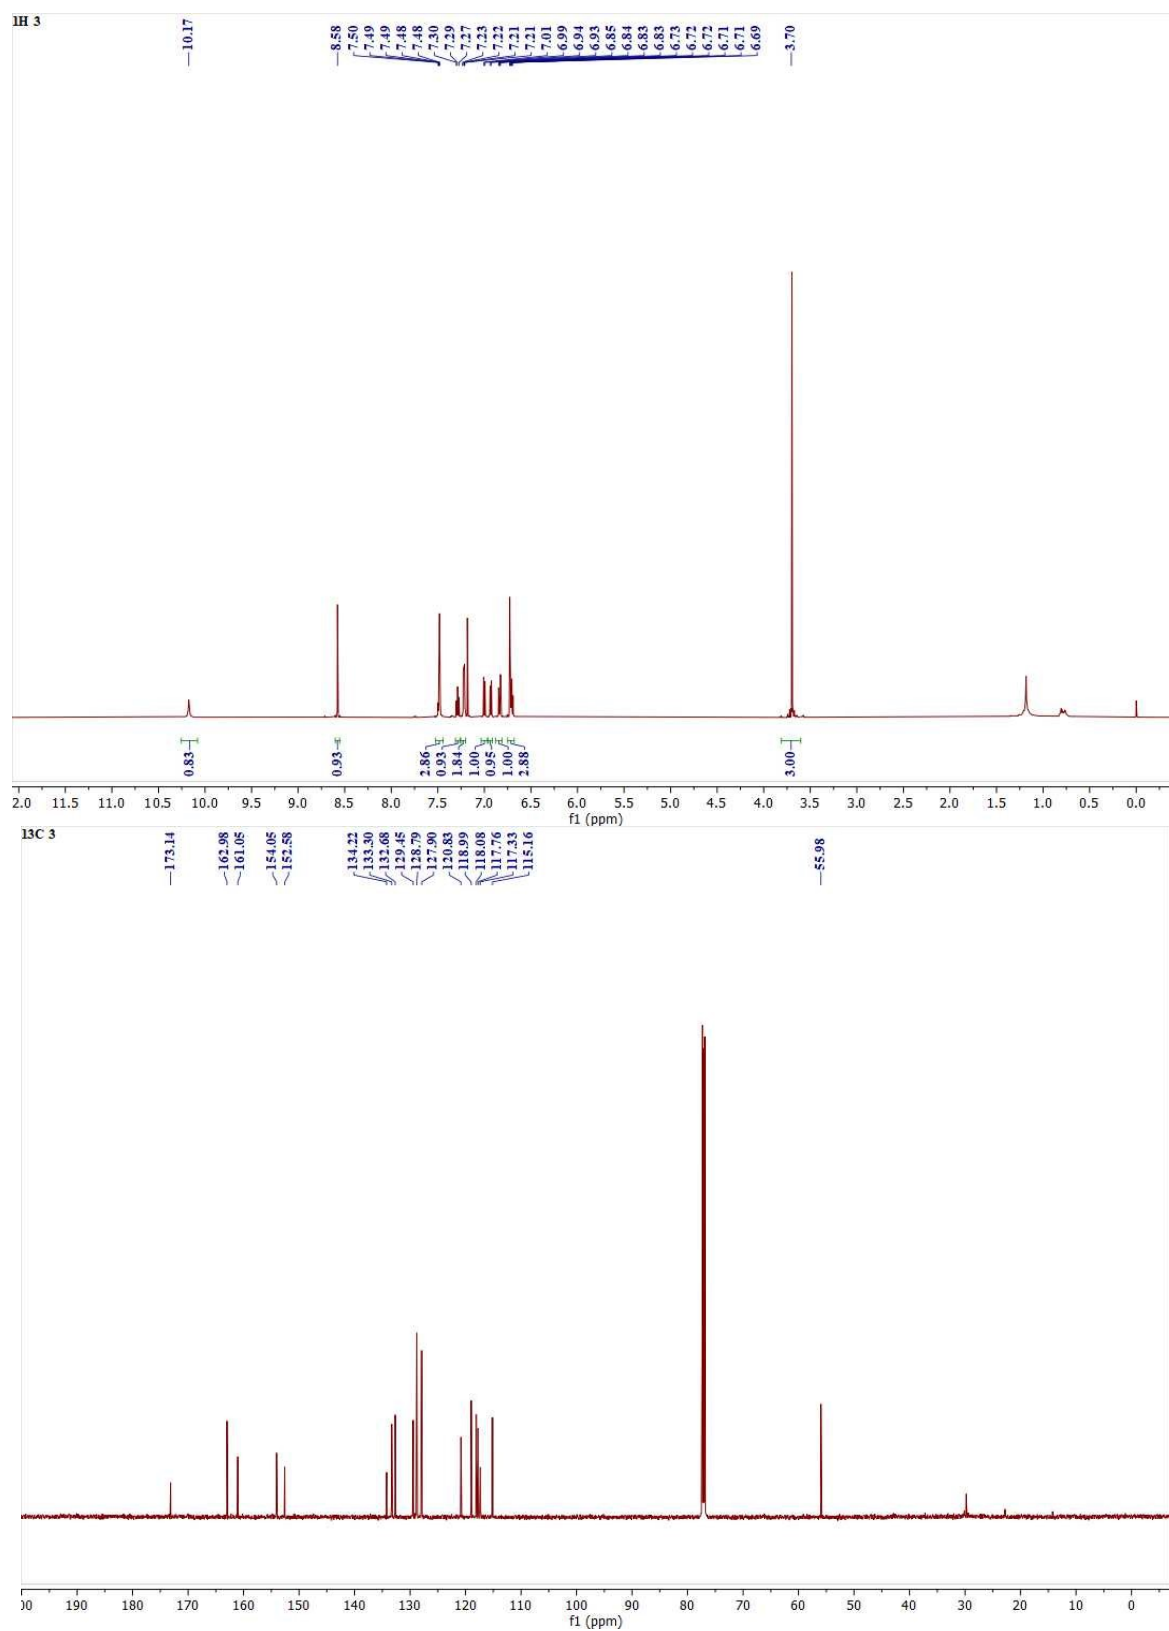

**<sup>1</sup>H & <sup>13</sup>C NMR of 3**

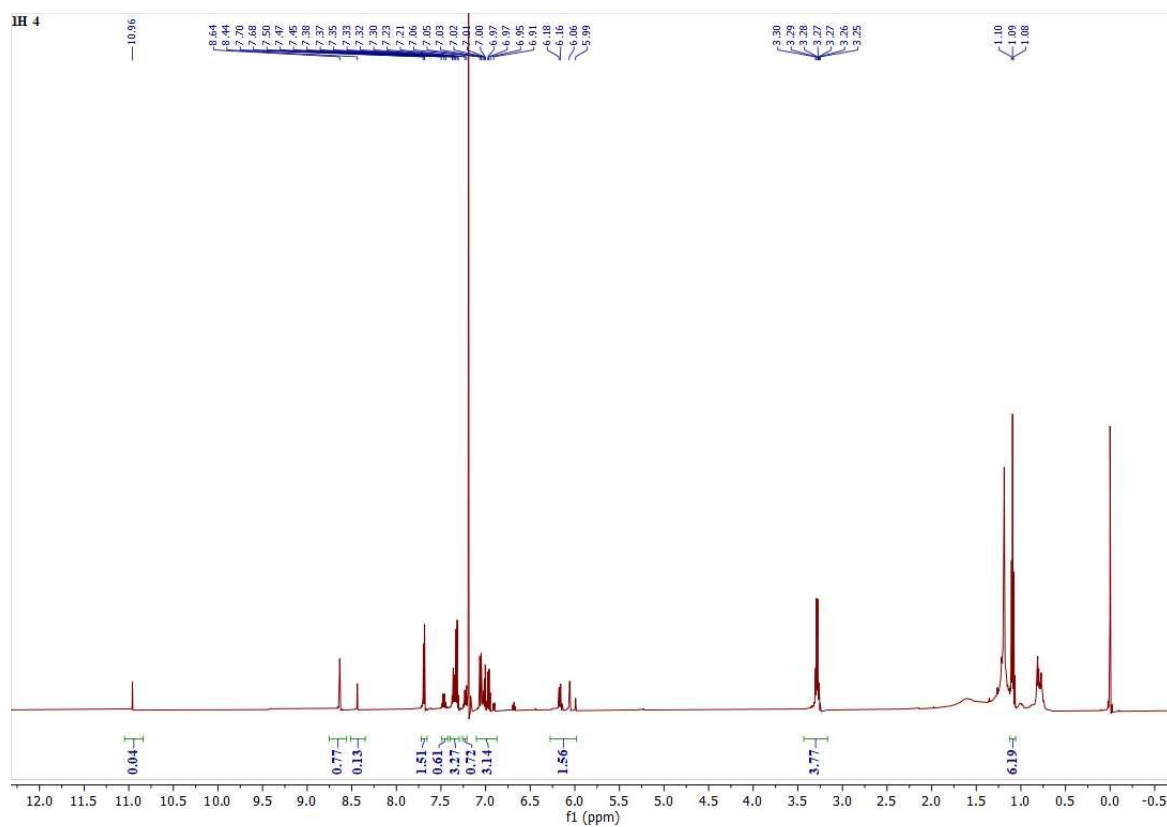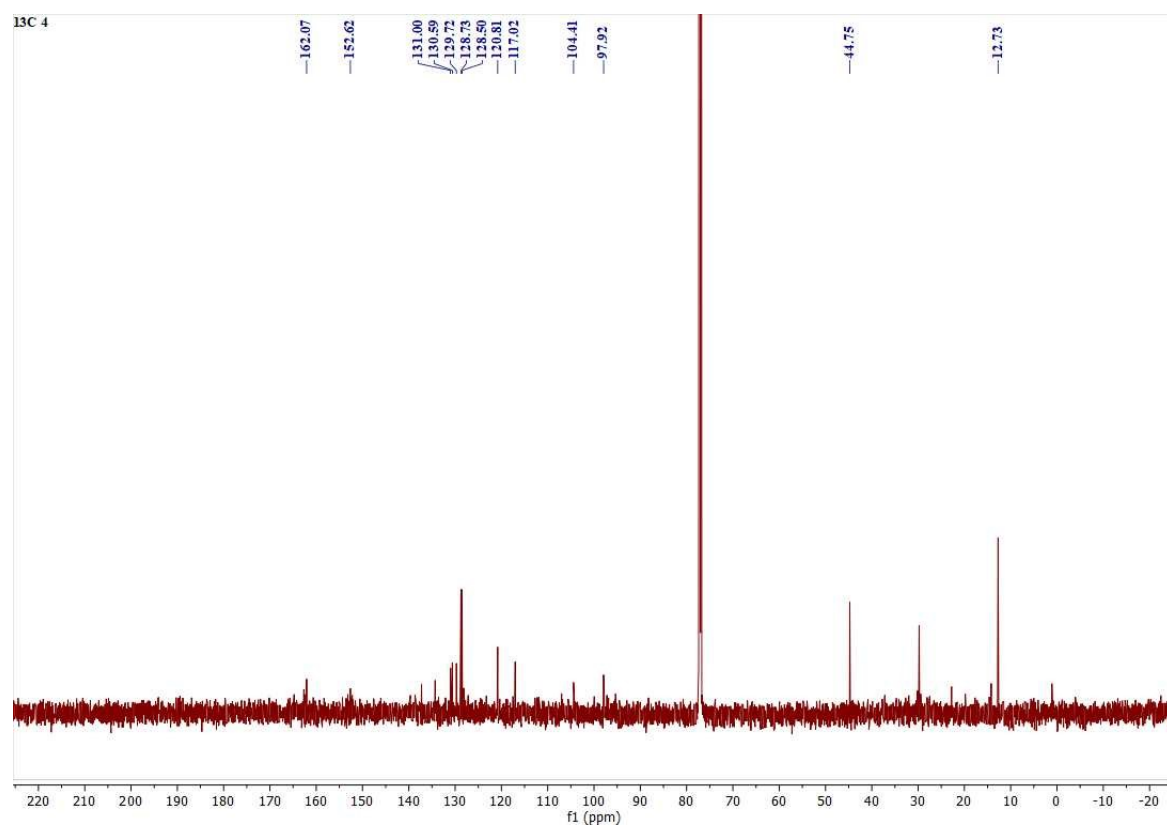

**<sup>1</sup>H & <sup>13</sup>C NMR of 4**

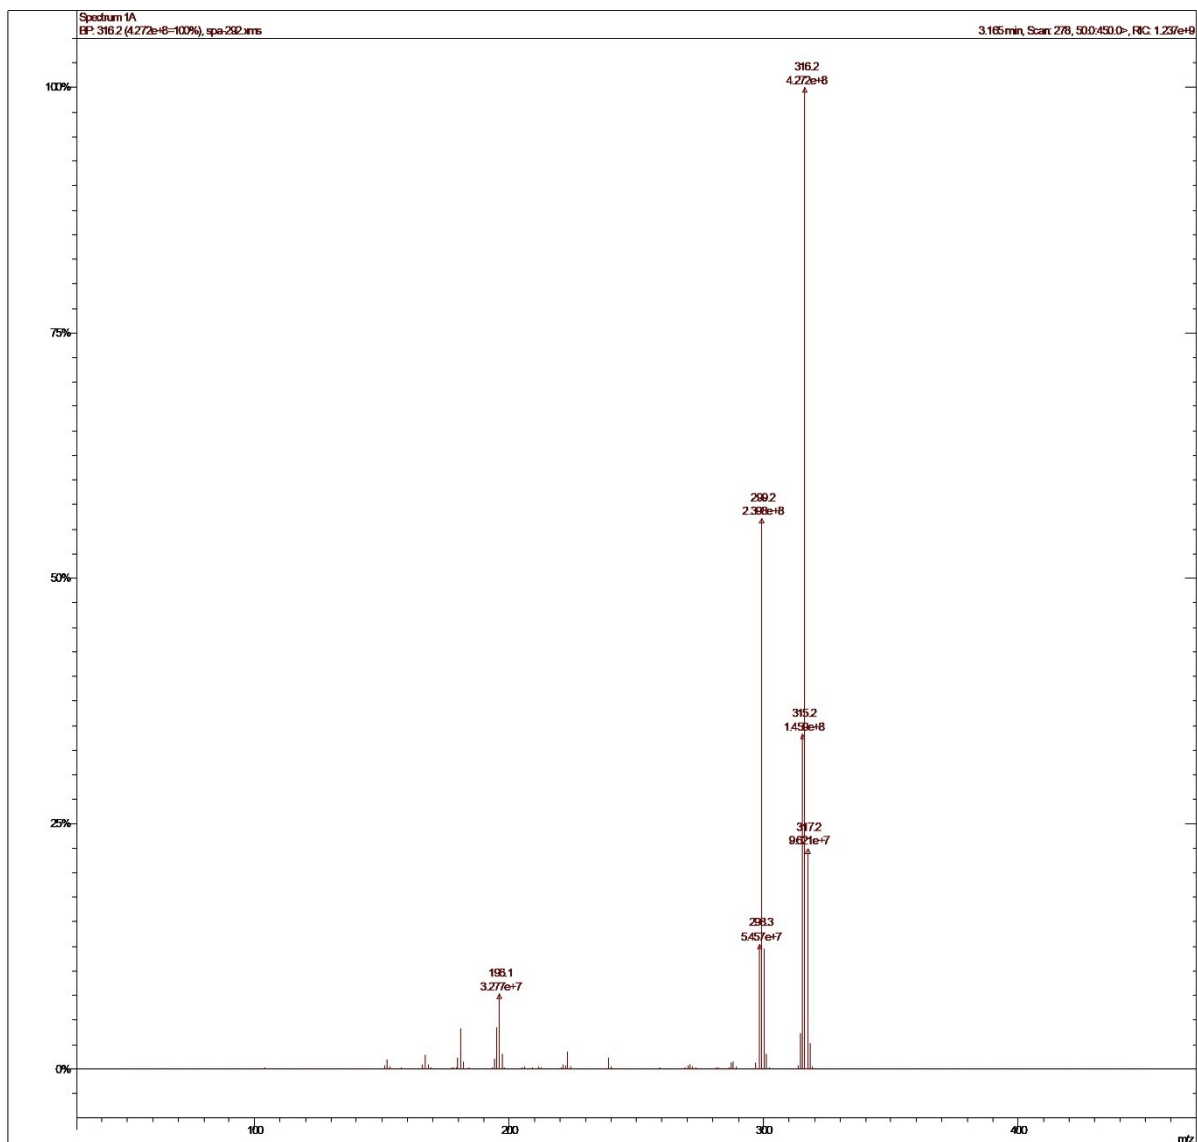

**I:** m/z calcd for  $C_{20}H_{16}N_2O_2$  (M + H): 316.12, found: 316.2.

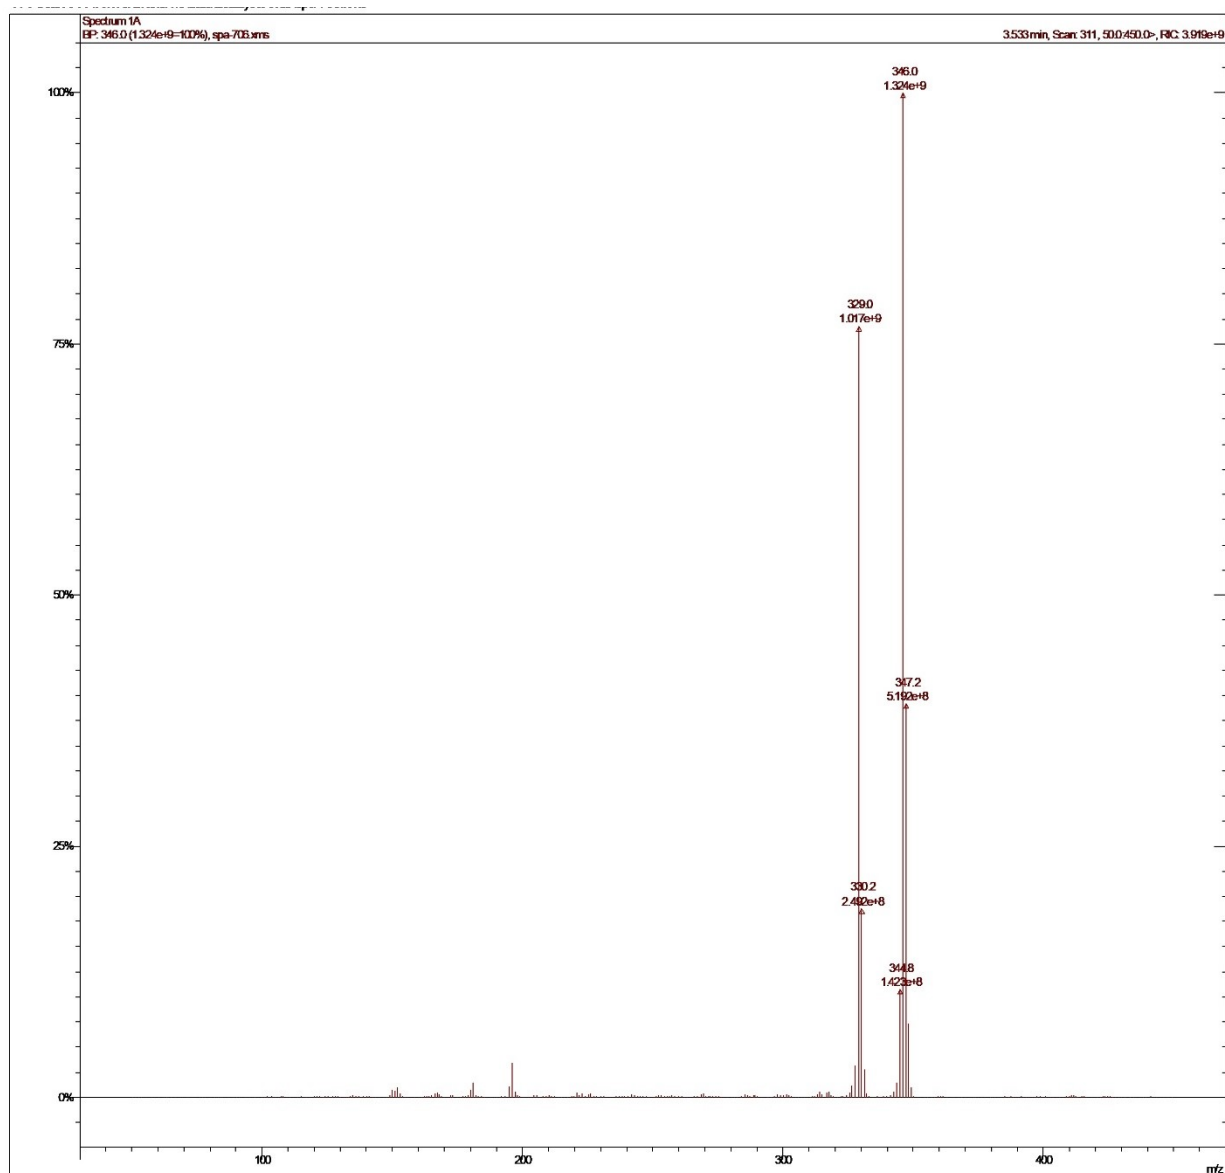

**2:** m/z calcd for  $C_{21}H_{18}N_2O_3$  (M + H): 346.13, found: 346.0.

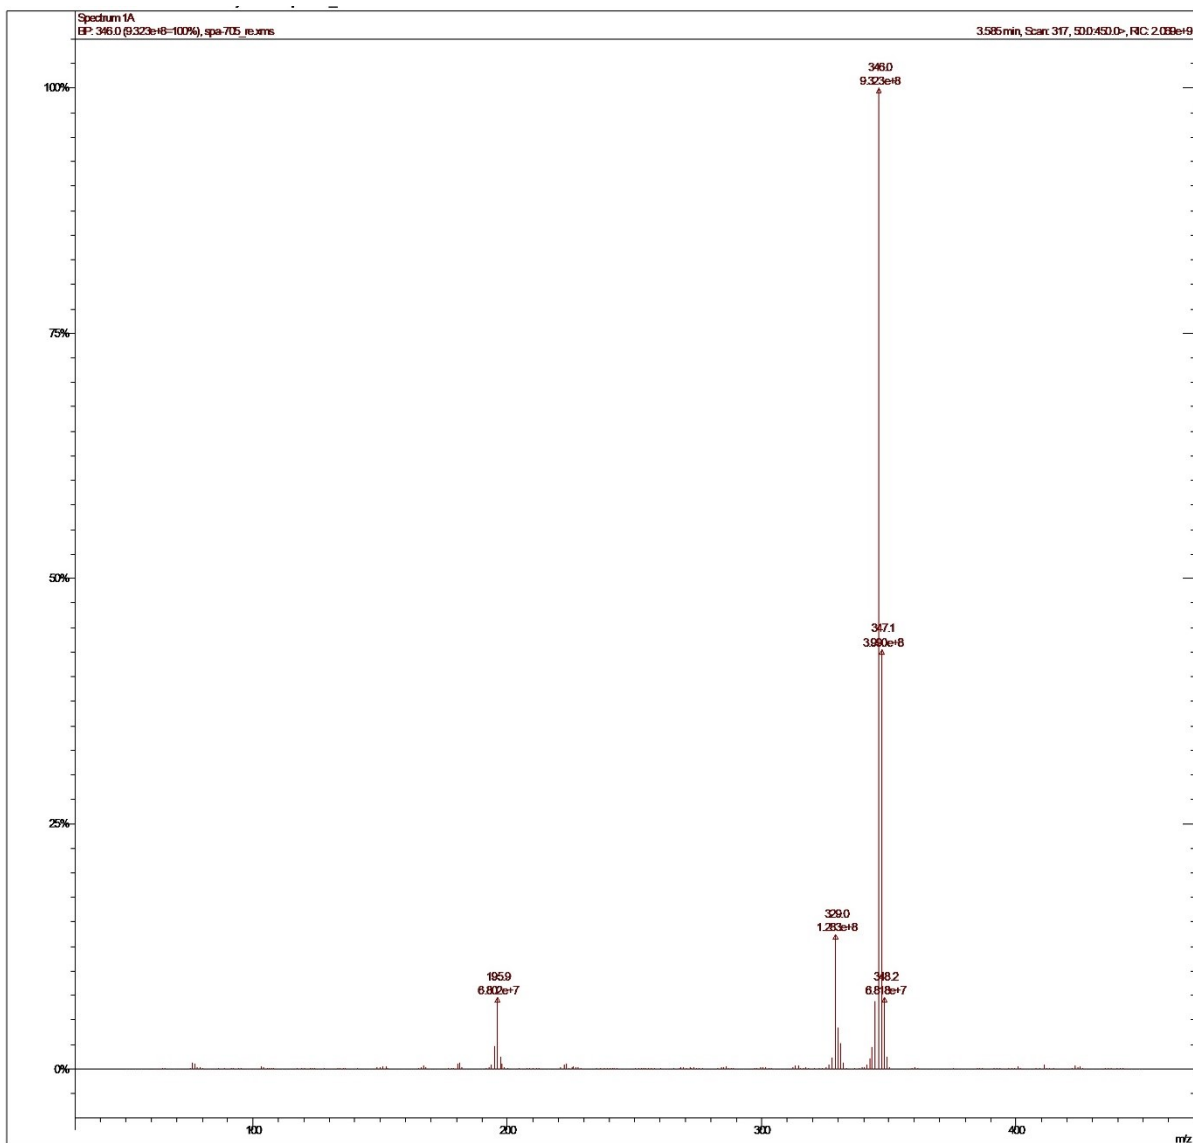

**3:** m/z calcd for  $C_{21}H_{18}N_2O_3$  (M + H): 346.13, found: 346.0.

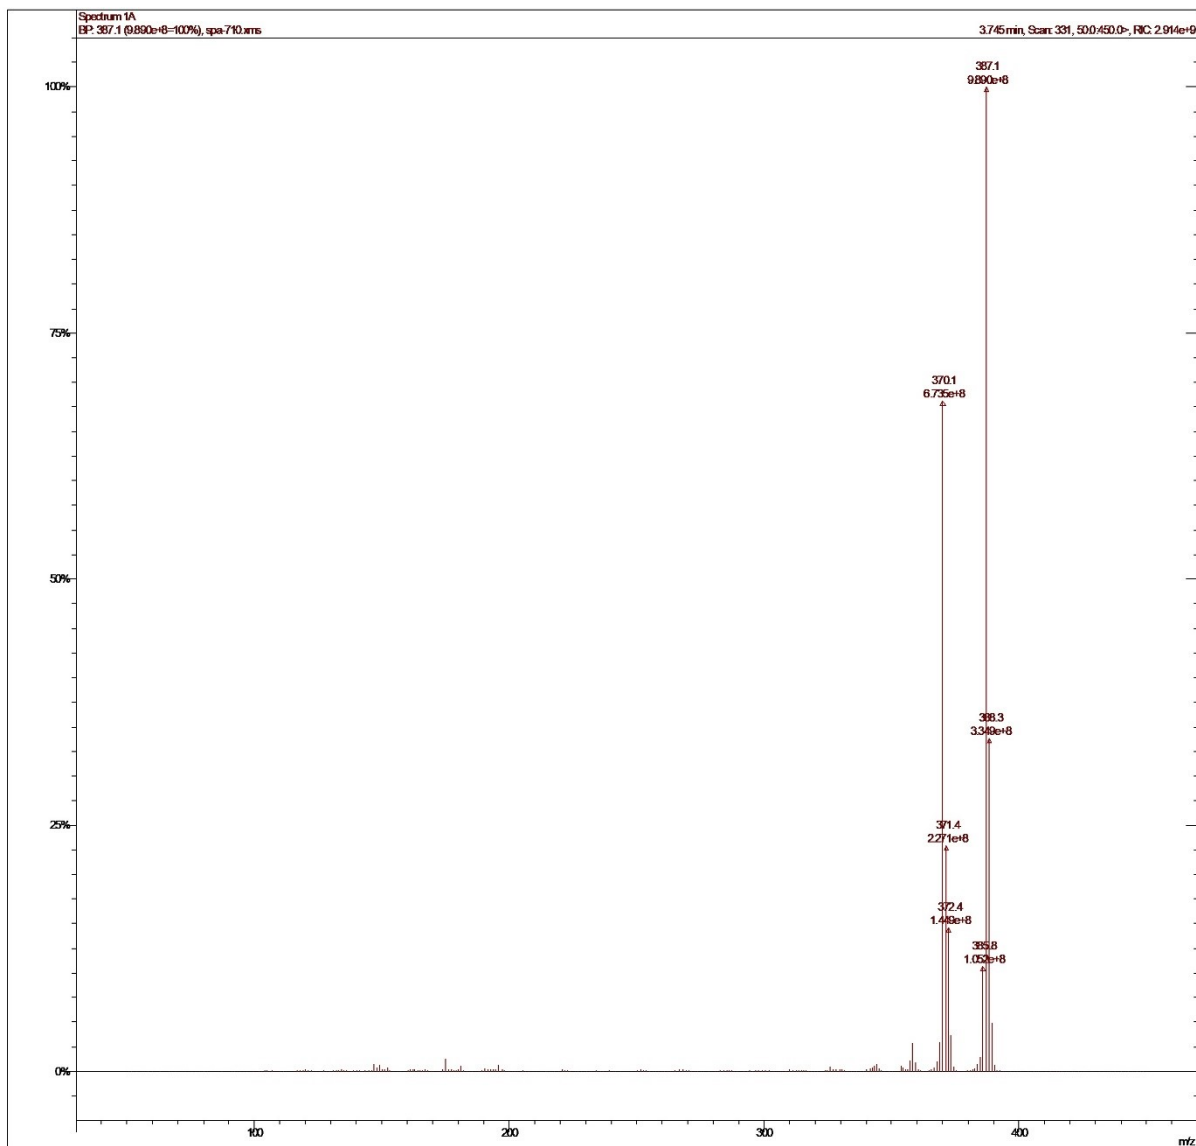

4: m/z calcd for  $C_{24}H_{25}N_3O_2$  (M + H): 387.19, found: 387.1.

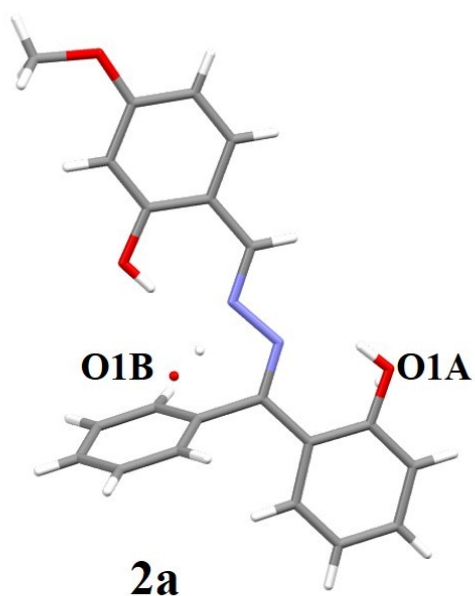

OH occupancy is 63:37 at O1A:O1B

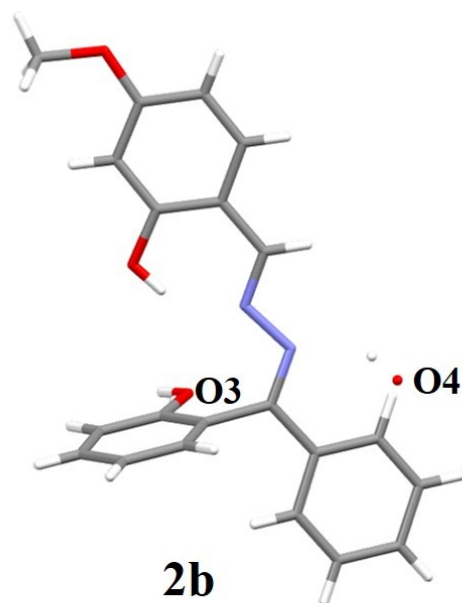

OH occupancy is 56:44 at O3:O4

**Figure S1.**  
lattice of 2a and 2b.  
respective position is  
N (blue) and O (red).

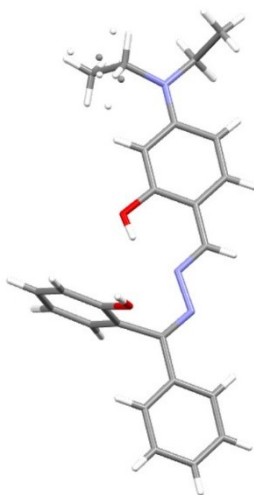

Disordered structure of **2** in the crystal  
The occupancy percentage of OH in the  
given at the bottom. C (grey), H (white)

**Figure S2.** Disordered structure of **2** in the crystal lattice. C (grey), H (white) N (blue) and O (red).

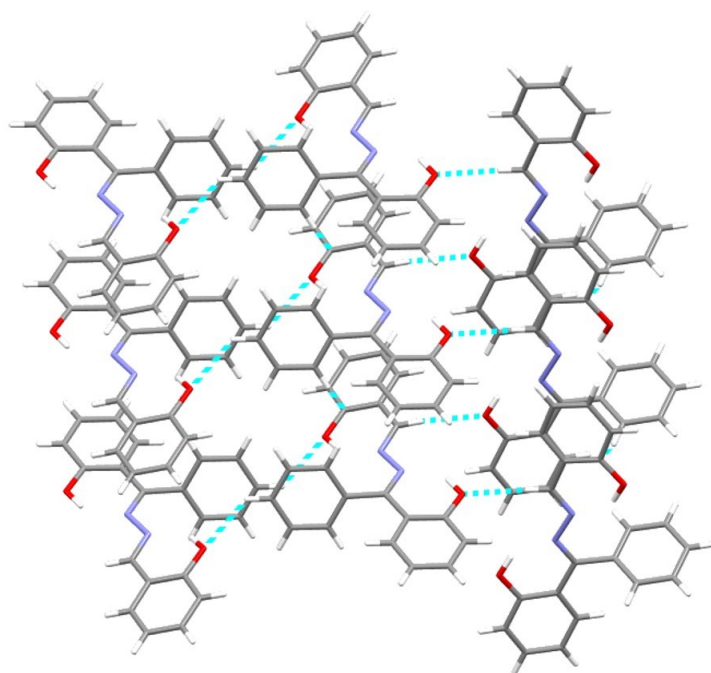

**Figure S3.** Intermolecular interactions in the crystal lattice of **1**. C (grey), H (white), N (blue) and O (red). Dotted lines indicate the hydrogen bonding interactions in Å.

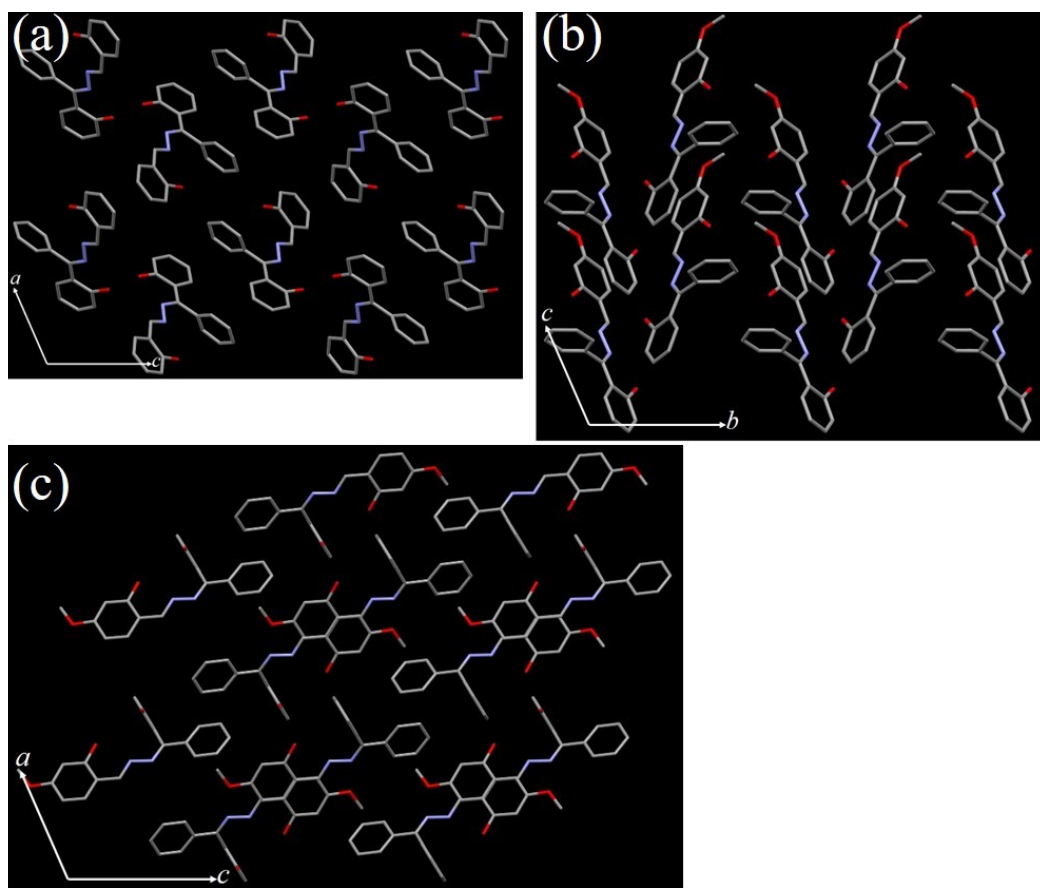

**Figure S4.** Molecular packing in the crystal lattice of (a) **1**, (b) **2a** and (c) **2b**. C (grey), H (white), N (blue) and O (red). Dotted lines indicate the hydrogen bonding interactions in Å.

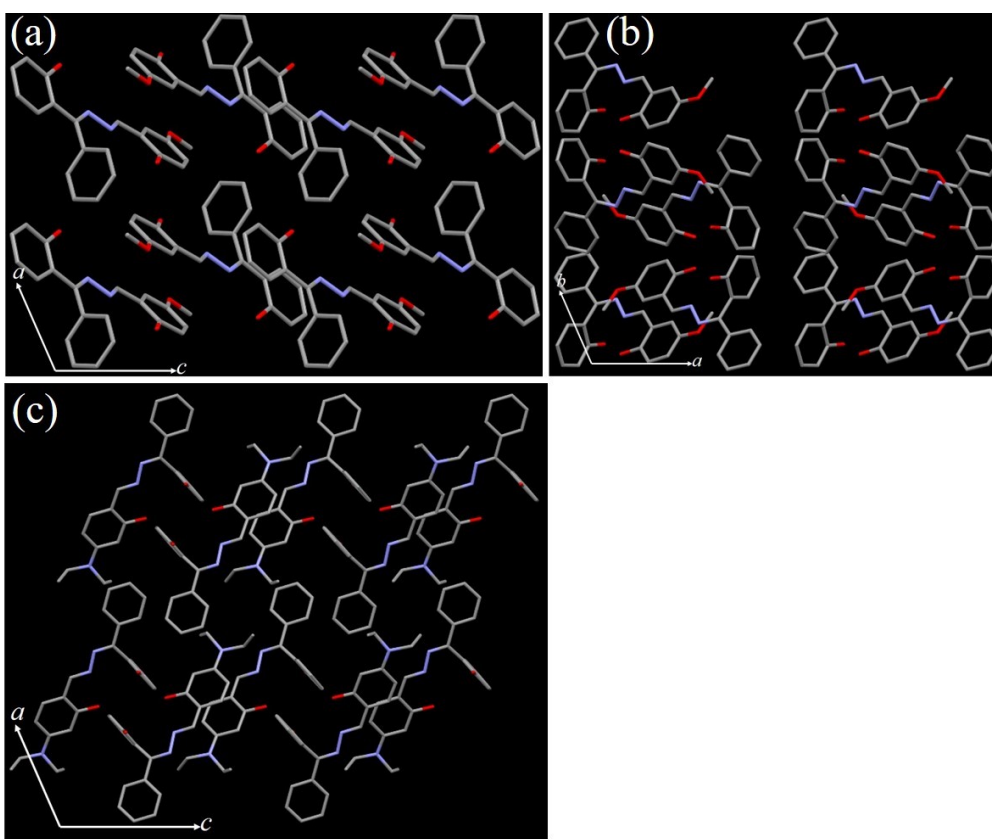

**Figure S5.** Molecular packing in the crystal lattice of (a) **3-Y**, (b) **3-R** and (c) **4**. C (grey), H (white), N (blue) and O (red). Dotted lines indicate the hydrogen bonding interactions in Å.

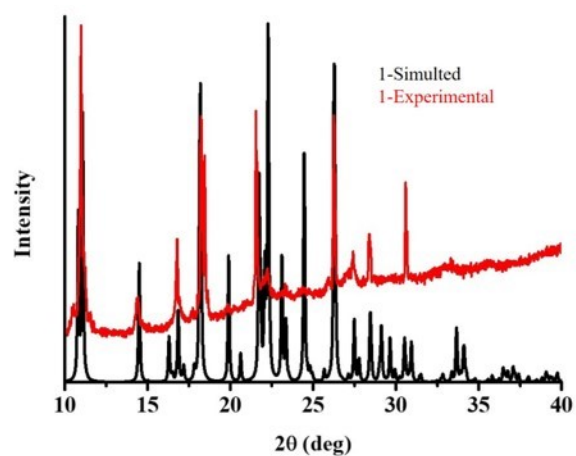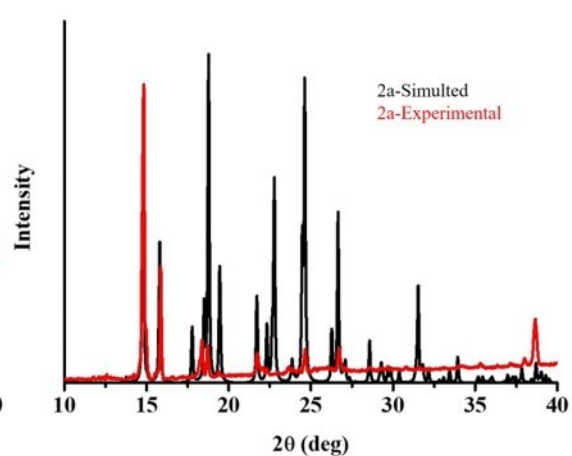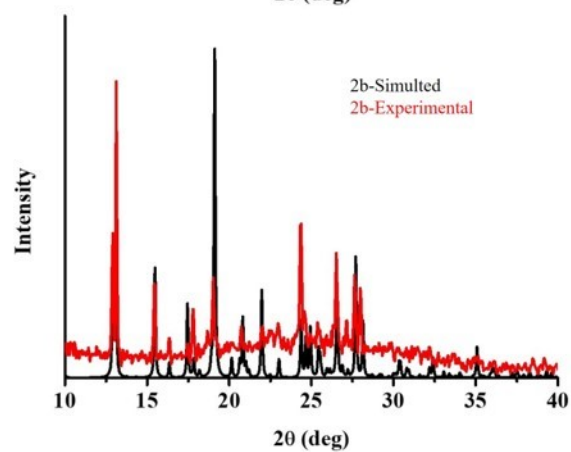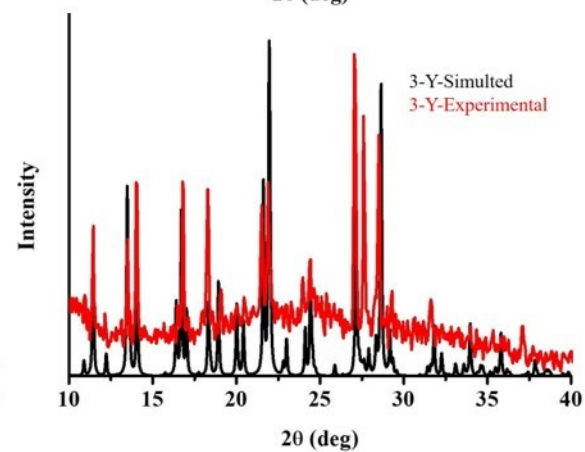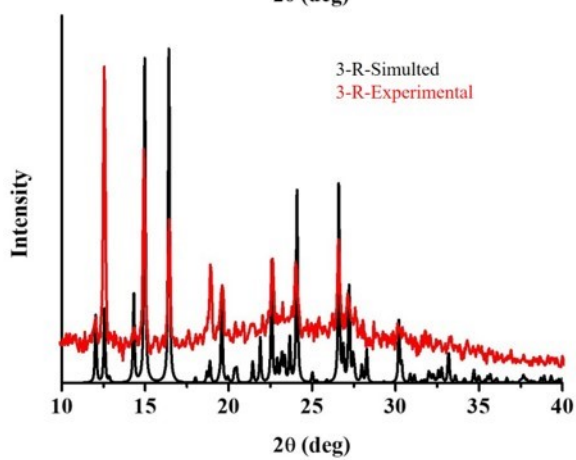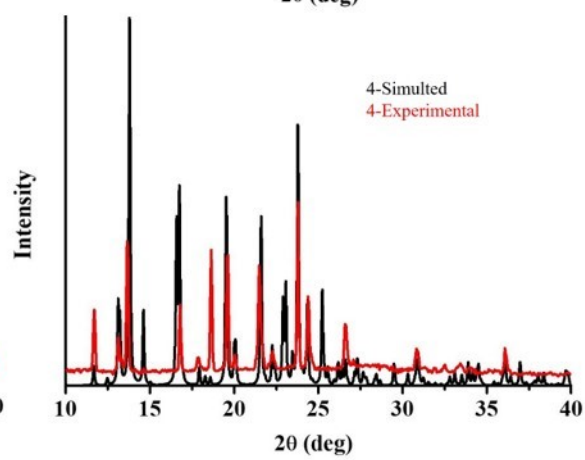

**Figure S6.** Comparison of experimental and simulated PXRD pattern of **1-4**.

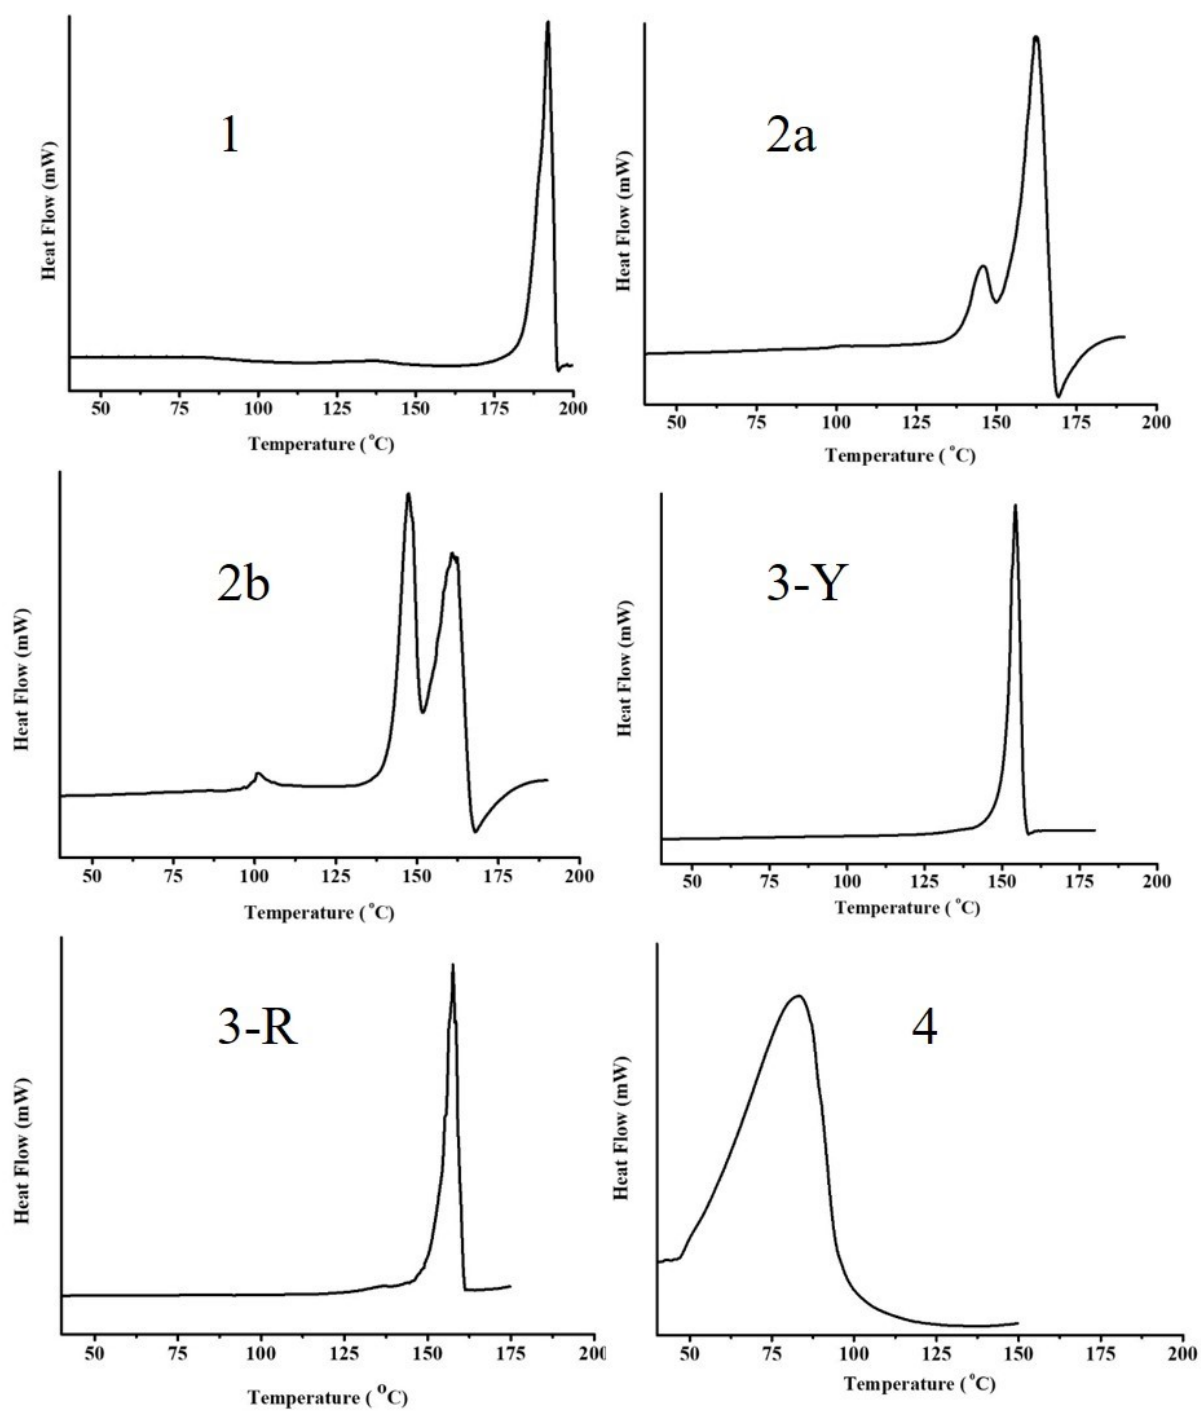

**Figure S7.** DSC of 1-4.

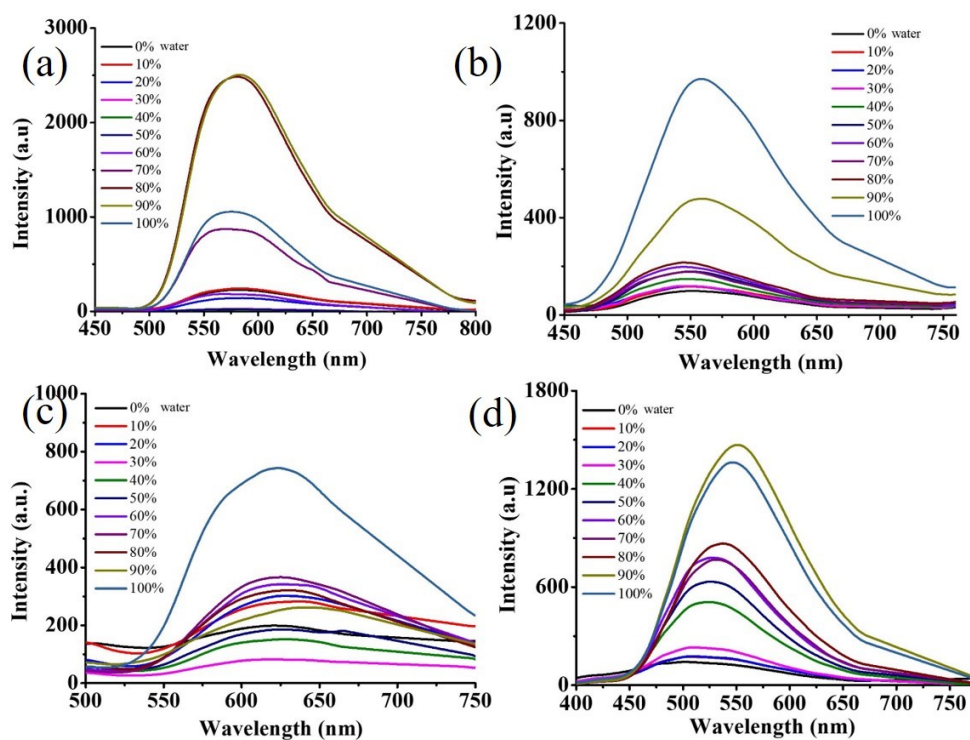

**Figure S8.** AIE studies of 1-4 in  $\text{CH}_3\text{CN}$ :water mixture.

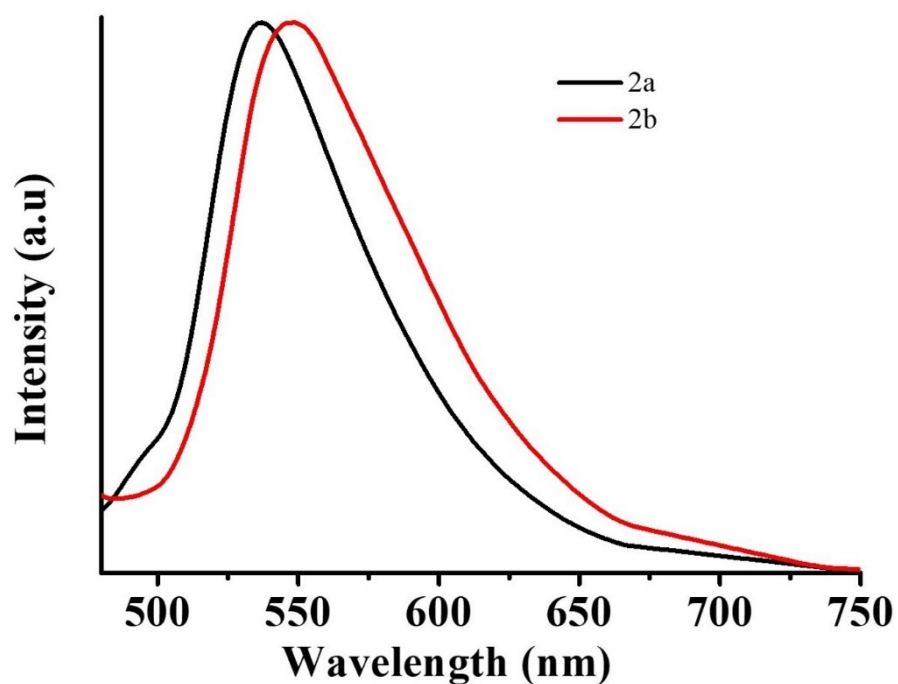

**Figure S9.** Solid state fluorescence spectra of 2a and 2b.

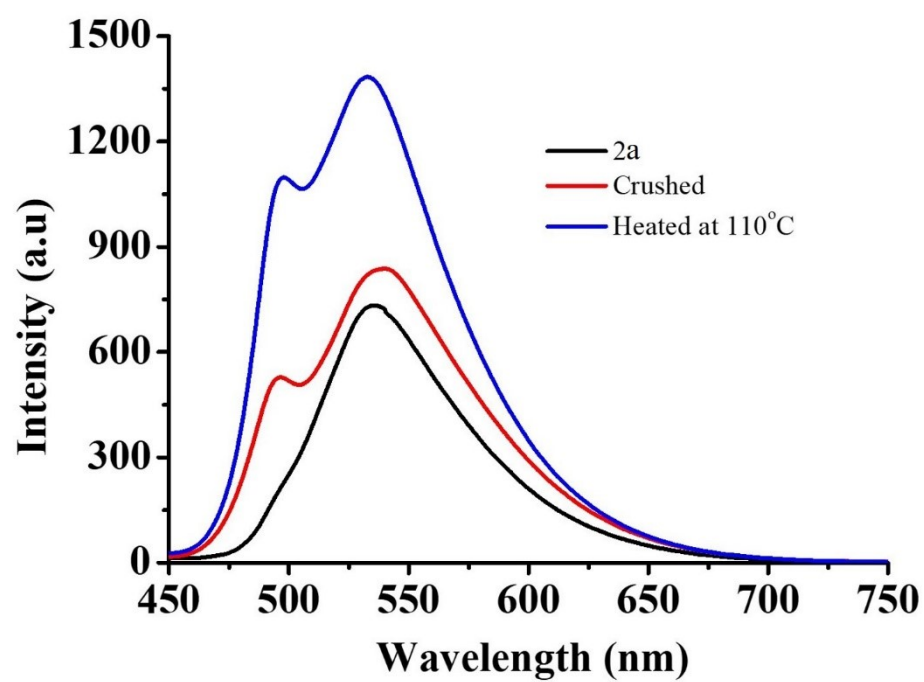

**Figure S10.** Mechanofluorochromism of **2a**.

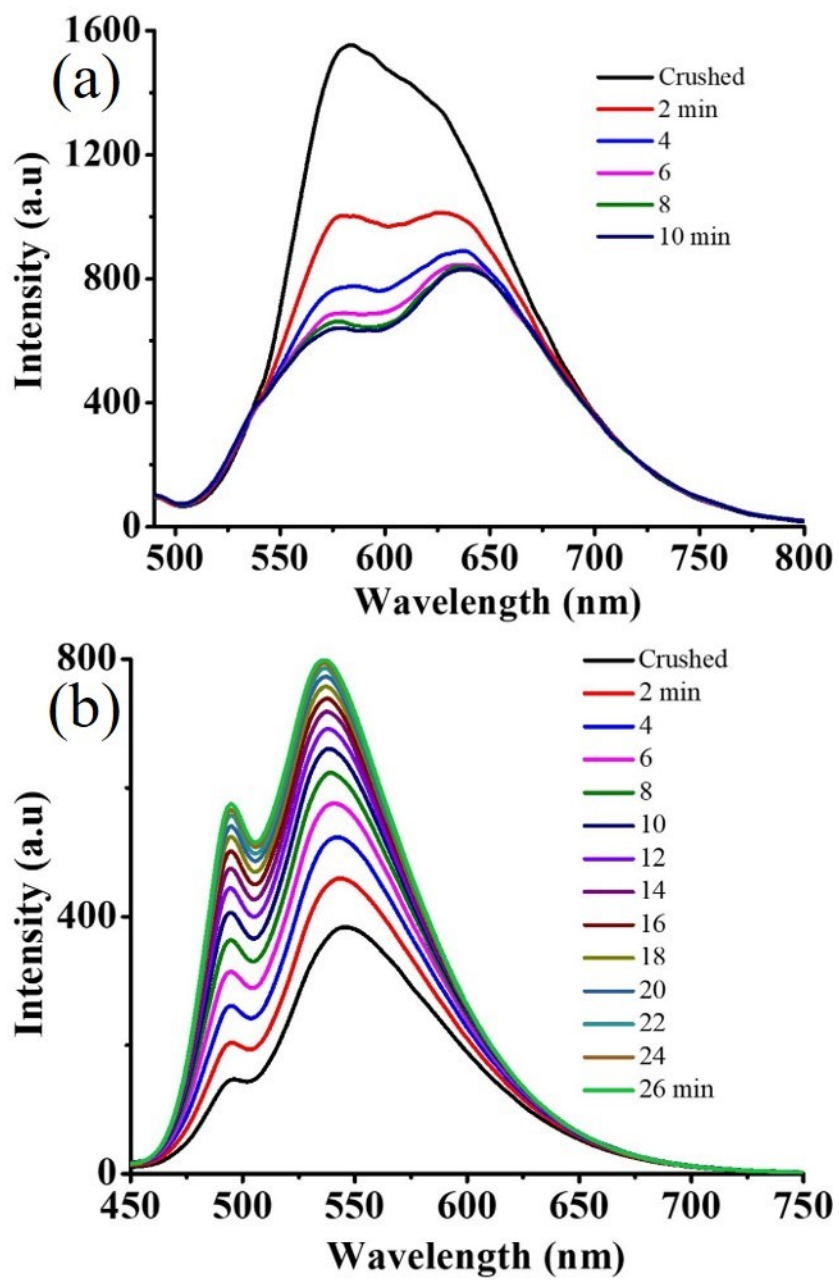

**Figure S11.** Self-reversible mechanofluorochromism of (a) **1** and (b) **2a**.
